# Supplementary material for: A novel microfluidic device to model the human proximal tubule and glomerulus
Source: Royal Society of Chemistry journal article supplement (doi:10.1039/c6ra25641d), 2017-01-01
Supplement: c6ra25641d1.pdf [file c6ra25641d1.pdf]

## Supplemental Materials

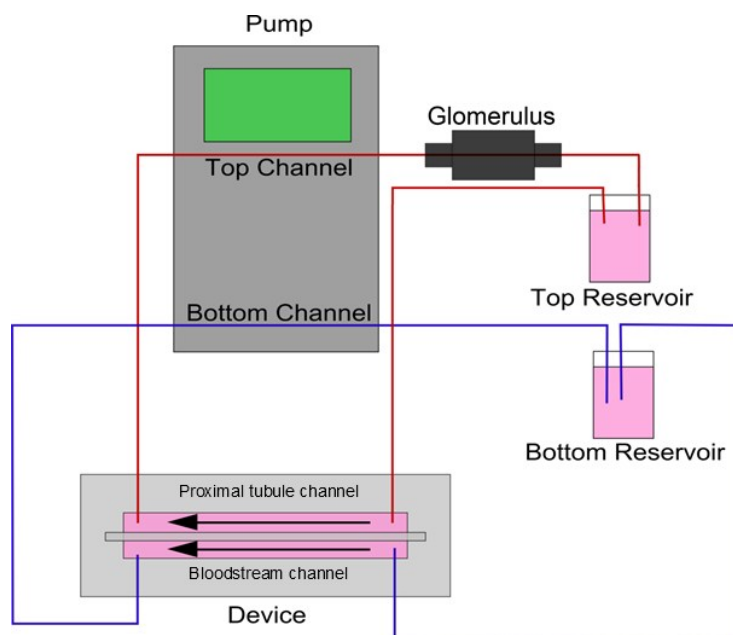

**Supplemental Fig. 1** Schematic diagram depicting multi-channel microfluidic device layout. Areas of interest are highlighted here, showing the organization of the glomerulus with the “proximal tubule” channel, as well as the independent “bloodstream” channel on the bottom.

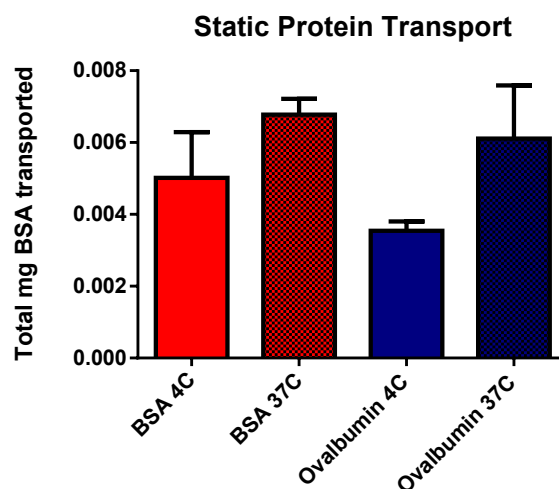

**Supplemental Fig 2** Results of static protein transport of fluorescently tagged BSA and ovalbumin. While slight increases occur between 4°C (passive transport) and 37°C (total transport; active and passive), indicating a degree of active transport in these cells, no statistical significance was observed.
